# Supplementary material
Source: PubMed Central journal article supplement (PMC5130164)
Supplement: NIHMS824291-supplement-9.pdf [file NIHMS824291-supplement-9.pdf]

**Table S1. Representation of the Nup82 holocomplex components.** Related to Figure 1.

| Components                                                                                                              | Rigid domains                                                                       | Segments                                                                                                                                                                                                                               |                                                                         |                                                       |         |                |   |
|-------------------------------------------------------------------------------------------------------------------------|-------------------------------------------------------------------------------------|----------------------------------------------------------------------------------------------------------------------------------------------------------------------------------------------------------------------------------------|-------------------------------------------------------------------------|-------------------------------------------------------|---------|----------------|---|
|                                                                                                                         |                                                                                     | structured segments with templates                                                                                                                                                                                                     |                                                                         | disordered and/or unknown segments without a template |         |                |   |
|                                                                                                                         |                                                                                     | begins at                                                                                                                                                                                                                              | ends at                                                                 | begins at                                             | ends at | flexible beads |   |
| Dyn2                                                                                                                    | 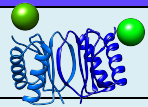   | <b>Dyn2 dimer (7-92)</b><br>7-92: X-ray 4DS1_A / C                                                                                                                                                                                     | 7                                                                       | 92                                                    | 1       | 6              | 1 |
|                                                                                                                         | Nup82                                                                               |                                                                                                                                                       | <b>NTD (7-452), beta-propeller</b><br>7-452: X-ray 3PBP_G (100% seq id) | 7                                                     | 16      | 1              | 6 |
| <b>Flexible linker region</b>                                                                                           |                                                                                     |                                                                                                                                                                                                                                        | 23                                                                      | 120                                                   | 17      | 22             | 1 |
| <b>CTD (522-713), 3 coiled-coils</b><br>522-713: Model 5CWS_E (15% seq id, HHpred)<br>Model 5C3L_A (14% seq id, HHpred) |                                                                                     |                                                                                                                                                                                                                                        | 123                                                                     | 452                                                   | 121     | 122            | 1 |
|                                                                                                                         |                                                                                     |                                                                                                                                                                                                                                        |                                                                         |                                                       | 453     | 521            | 7 |
| Nup159                                                                                                                  |   | <b>NTD (1-381), beta-propeller</b><br>2-381: X-ray 1XIP_A (100% seq id)                                                                                                                                                                | 2                                                                       | 347                                                   | 1       | 1              | 1 |
|                                                                                                                         |                                                                                     | <b>Disordered FG region</b>                                                                                                                                                                                                            | 362                                                                     | 381                                                   | 348     | 361            | 2 |
|                                                                                                                         |                                                                                     | <b>CTD (1117-1460), 3 coiled-coils (1211-1412)</b><br>1117-1126: X-ray 4DS1_B / D (bound to Dyn2)<br>1211-1412: Model 5CWS_D (12% seq id, HHpred)<br>Model 5C3L_B (10% seq id, MUSCLE)<br>1429-1456: X-ray 3PBP_I (bound to Nup82 NTD) | 1117                                                                    | 1126                                                  | 1127    | 1210           | 9 |
|                                                                                                                         |                                                                                     |                                                                                                                                                                                                                                        | 1211                                                                    | 1239                                                  | 1240    | 1265           | 3 |
|                                                                                                                         |                                                                                     |                                                                                                                                                                                                                                        | 1266                                                                    | 1321                                                  | 1322    | 1331           | 1 |
| Nsp1                                                                                                                    |  | <b>Disordered FG region</b>                                                                                                                                                                                                            |                                                                         |                                                       | 382     | 1116           | 8 |
|                                                                                                                         |                                                                                     | <b>CTD (637-823), 3 coiled-coils</b><br>637-823: Model 5CWS_C (32% seq id, HHpred)<br>Model 5C3L_C (26% seq id, HHpred)                                                                                                                | 637                                                                     | 727                                                   | 728     | 741            | 2 |
|                                                                                                                         |                                                                                     |                                                                                                                                                                                                                                        | 742                                                                     | 778                                                   | 779     | 787            | 1 |
| Nup116                                                                                                                  |  | <b>Disordered FG region</b>                                                                                                                                                                                                            |                                                                         |                                                       | 1       | 636            | 7 |
|                                                                                                                         |                                                                                     | <b>Flexible linker region</b>                                                                                                                                                                                                          |                                                                         |                                                       | 751     | 965            | 9 |
|                                                                                                                         |                                                                                     | <b>CTD (966-1113)</b><br>966-1111: X-ray 3PBP_H (bound to Nup82 NTD)<br>X-ray 3NF5 (59% seq id)                                                                                                                                        | 966                                                                     | 1111                                                  | 1112    | 1113           | 1 |

**Table S3. Unique inter-subunit DSS cross-links identified connecting components of the cytoplasmic mRNA export platform.** Related to Figures 3 and 6.

| Protein1 (residue1) | Protein2 (residue2) | Cross-linked peptides (residue)                  | Modification | P-value | mass     | ppm  |
|---------------------|---------------------|--------------------------------------------------|--------------|---------|----------|------|
| Nup159(1384)        | Seh1(198)           | RLDDNPLVAKLAK(10)-GKDGK(2)                       |              | 1.E-03  | 2093.184 | 0.5  |
| Nup159(1367)        | Seh1(244)           | INHTEELLNILKLFVTK(12)-IFKITEK(3)                 |              | 5.E-06  | 3039.762 | 2.4  |
| Nup159(1387)        | Seh1(198)           | LAKESLAR(3)-GKDGK(2)                             |              | 4.E-02  | 1527.862 | 1.5  |
| Seh1(244)           | Nup159(1372)        | IFKITEK(3)-LFTVKNK(5)                            |              | 6.E-04  | 1864.107 | -1.3 |
| Nup82(649)          | Nup85(2)            | NQILQFNSFVHSQKSLQQDLSYLK(14)-TIDDSNR(1)          |              | 7.E-07  | 3821.922 | 2.6  |
| Nup82(659)          | Nup85(2)            | SLQQDLSYLKSELTR(10)-TIDDSNR(1)                   |              | 2.E-09  | 2737.377 | 5.3  |
| Nup85(231)          | Nup82(622)          | SDGEPDEEYIEQVFSVKDSTAGK(17)-KISHGEMK(1)          |              | 2.E-04  | 3595.687 | 0.7  |
| Nup82(671)          | Nup145(773)         | IEAETIKVDKK(7)-DIVGKSGVSIK(5)                    |              | 4.E-03  | 2512.436 | 1.7  |
| Nup145(696)         | Nup159(1397)        | LDVSKDWVEQLILAGSSLR(5)-DGLLKEIK(5)               |              | 4.9E-02 | 3192.839 | 2.5  |
| Nup82(251)          | Gle1(48)            | NVIKQLQFVSK(4)-LPSFTKVGTK(6)                     |              | 2.E-05  | 2517.457 | 3.8  |
| Nup116(1070)/(1067) | Gle1(48)            | KPIKDPNHQLVK(4)-LPSFTKVGTK(6)                    |              | 4.E-06  | 2630.516 | -2.7 |
| Gle1(53)            | Nup82(251)          | KLVNESVILDPALLENALR(1)-NVIKQLQFVSK(4)            |              | 3.E-02  | 3533.023 | 1.9  |
| Gle1(115)           | Nsp1(613)           | ASHSSLLDNAKNSNATAPLLEAIEESFQR(11)-STADVKSDDLK(6) |              | 9.E-07  | 4487.230 | -3.7 |
| Nup159(1198)        | Gle1(134)           | EYYTSAKVSNIQFVSNSTLR(7)-KMQLVLANQK(1)            |              | 8.E-17  | 3826.993 | 0.9  |
| Gle1(144)           | Nsp1(613)           | MQNLVLANQKEIQSIR(10)-STADVKSDDLK(6)              |              | 5.E-07  | 3258.713 | 0.9  |
| Gle1(144)           | Nsp1(607)           | KMQNLVLANQKEIQSIR(11)-TEESSTGKSTADV(8)           |              | 1.E-09  | 3588.867 | -1.2 |
| Gle1(144)           | Nsp1(599)           | KMQNLVLANQKEIQSIR(11)-KTEESSTGK(1)               |              | 2.E-08  | 3115.655 | 1.8  |
| Gle1(144)           | Nsp1(574)           | MQNLVLANQKEIQSIR(10)-AAISFGAKPEEQK(8)            |              | 7.E-02  | 3396.807 | 4.1  |
| Gle1(144)           | Nsp1(585)           | MQNLVLANQKEIQSIR(10)-SSDTSKPAFTFGAQK(6)          |              | 1.E-06  | 3592.856 | 0.6  |
| Nup42(407)          | Gle1(231)           | FVQGLSSEKDGILELADLAEETLKIFR(24)-EHEAKLLQQK(5)    |              | 4.E-04  | 4381.342 | 2.3  |
| Nup42(392)          | Gle1(259)           | FVQGLSSEKDGILELADLAEETLK(9)-DKIAQIK(2)           |              | 5.E-06  | 3556.913 | 0.5  |
| Nup116(952)         | Nsp1(370)/(465)     | QEYSEDDKAVFADVAEK(9)-KDGDAKPAFSGAK(1)            |              | 4.E-04  | 3733.800 | -5.3 |
| Nup116(1067)        | Nup159(1460)        | KPIKDPNHQLVK(1)-NLNMAK(6)                        | Oxi          | 1.E-05  | 2259.241 | 3.7  |
| Nup116(935)         | Nup82(587)          | HHSRNMDEENKENVADLQK(11)-KWDAQLSR(1)              |              | 2.E-02  | 3433.643 | 9.6  |

**Table S4. Summary of SAXS experiments.** Related to Figure 2.

**Data collection**

|                                    |                                                                 |
|------------------------------------|-----------------------------------------------------------------|
| Beamline                           | SSRL Beam Line BL4-2, SLAC National Accelerator Laboratory      |
| Defining Slits size (mm)           | 0.3 (H) × 0.3 (V)                                               |
| Beam energy (keV)                  | 11                                                              |
| Sample-Detector Distance (m)       | 1.7                                                             |
| Detector                           | Rayonix MX225-HE                                                |
| Pixel binning                      | 8 × 8                                                           |
| Pixel size (μm)                    | 292                                                             |
| Exposure time (sec)                | 1                                                               |
| Images                             | Images taken for duration of run = ~20 images per concentration |
| Type of sample Cell                | Quartz capillary (Diameter = 1.5mm)                             |
| Temperature (K)                    | 288                                                             |
| Calibrant                          | AgBe                                                            |
| Final $q$ range (Å <sup>-1</sup> ) | 0.01 up to 0.45                                                 |

**Data analysis**

|                             |                                                                                                      |
|-----------------------------|------------------------------------------------------------------------------------------------------|
| Programs                    | SASTOOL (SasTool, 2013), PRIMUS (Konarev et al., 2003)                                               |
| Buffer                      | 10mM HEPES, 150mM NaCl, 10% (v/v) glycerol, 5mM DTT, pH 7.5                                          |
| Concentration range (mg/mL) | 0.5 - 5.0 (SAXS profiles at 1 mg/mL were shown in Figure S4)                                         |
| Guiner $R_g$ (Å)            | 23.0 (Nup82 <sup>4-220</sup> ), 26.6 (Nup82 <sup>4-452</sup> ), and 38.7 (Nup82 <sup>572-690</sup> ) |
| Guiner $qR_g$ limits        | 1.236, 1.032, and 1.293 (in the same order as above)                                                 |
| $D_{max}$ (Å)               | 72.2, 89.7, and 110.3 (in the same order as above)                                                   |

**Modeling**

|                                     |                                                       |
|-------------------------------------|-------------------------------------------------------|
| Programs                            | FoXS, DAMMIF, DAMMIN, DAMAVER                         |
| NSD* of the <i>ab initio</i> shapes | 0.540 (± 0.012), 0.597 (± 0.027), and 0.853 (± 0.027) |
| Data plotting                       | GNUPLOT, OPTIMUS, SAXS MOW, UCSF Chimera 1.10         |

\*Normalized spatial discrepancy
